# Supplementary material for: Characteristics and long-term kinetics of an azobenzene derivative and a donor–acceptor Stenhouse adduct as orthogonal photoswitches
Source: Royal Society of Chemistry journal article supplement (doi:10.1039/d3cp05786k), 2024-01-01
Supplement: d3cp05786k1.pdf [file d3cp05786k1.pdf]

## Supporting Information

### Characteristics and long-term kinetics of an azobenzene derivative and a donor-acceptor Stenhouse adduct as orthogonal photoswitches

Tanja Schmitt,<sup>a</sup> Christian Huck,<sup>a</sup> Nils Oberhof,<sup>b</sup> Li-Yun Hsu,<sup>c</sup> Eva Blasco<sup>c</sup> Andreas Dreuw<sup>b</sup> and Petra Tegeder\*<sup>a</sup>

<sup>a</sup> Physikalisch-Chemisches Institut, Ruprecht-Karls-Universität Heidelberg, 69120 Heidelberg, Germany

<sup>b</sup> Interdisziplinäres Zentrum für Wissenschaftliches Rechnen, Ruprecht-Karls-Universität Heidelberg, 69120 Heidelberg, Germany

<sup>c</sup> Institute for Molecular System Engineering and Advanced Materials, Ruprecht-Karls-Universität Heidelberg, 69120 Heidelberg, Germany

#### Table of contents

|                                           |    |
|-------------------------------------------|----|
| 1. Synthesis.....                         | 2  |
| 2. Sample preparation.....                | 2  |
| 2.1. UV/VIS absorption measurements ..... | 2  |
| 2.2. IR absorption measurements.....      | 2  |
| 3. UV/VIS absorption data.....            | 3  |
| 4. IR absorption data .....               | 12 |
| 5. Theory .....                           | 17 |
| 6. References.....                        | 28 |

## 1. Synthesis

The synthesis and purification of Azo and DASA are described elsewhere.<sup>1</sup>

## 2. Sample preparation

For sample preparation, toluene (Uvasol grade), acetonitrile (Uvasol grade), toluene-d<sub>8</sub> (99.6 % D) and acetonitrile-d<sub>3</sub> (≥99.8 % D) were purchased from Merck KGaA. All chemicals were used without further purification.

### 2.1. UV/VIS absorption measurements

Azo (1.3 mg, 2.0 μmol) was dissolved in toluene (650 μl) and sonicated for several minutes to ensure a homogeneous stock solution. Part of the stock solution (30 μl) was subsequently further diluted with toluene (3.000 ml).

DASA (1.0 mg, 3.3 μmol) was dissolved in toluene (1.000 ml) and sonicated for several minutes to ensure a homogeneous stock solution. Part of the stock solution (20 μl) was subsequently further diluted with toluene (3.000 ml).

For the equimolar mixtures of Azo and DASA, part of the above specified Azo stock solution (21 μl) and DASA stock solution (20 μl) was mixed and further diluted with toluene (2980 μl).

### 2.2. IR absorption measurements

DASA (1.0 mg, 3.3 μmol) was dissolved in toluene or acetonitrile (200 μl) and sonicated for several minutes to ensure a homogeneous solution.

### 3. UV/VIS absorption data

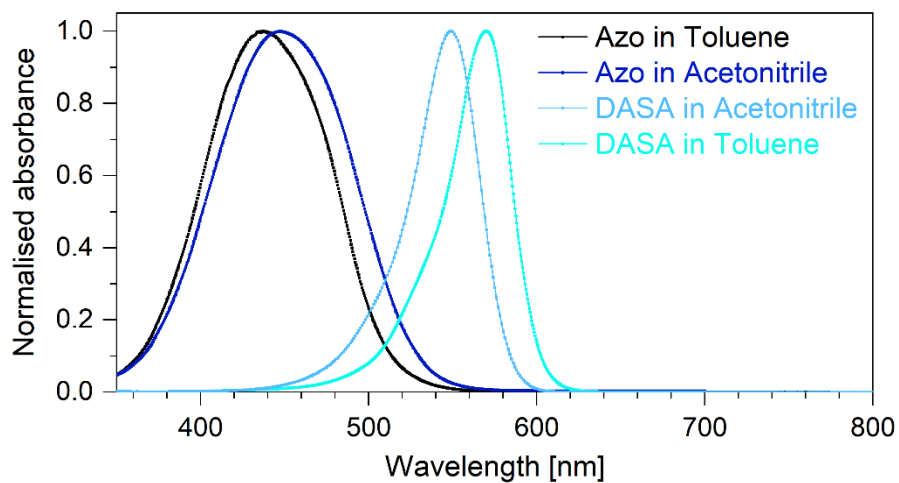

**Supplementary Figure S1** Shift of the absorption spectra of Azo and DASA in different environments due to solvatochromism.

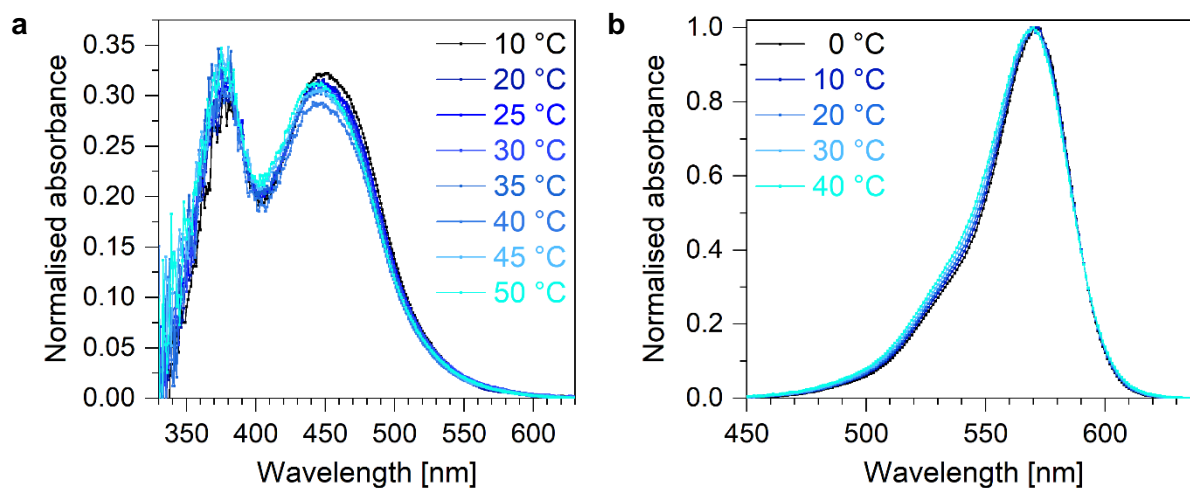

**Supplementary Figure S2** Hypsochromic shifts of the absorption maxima of (a) Z-Azo and E-Azo as well as (b) Z-DASA upon increasing temperature.

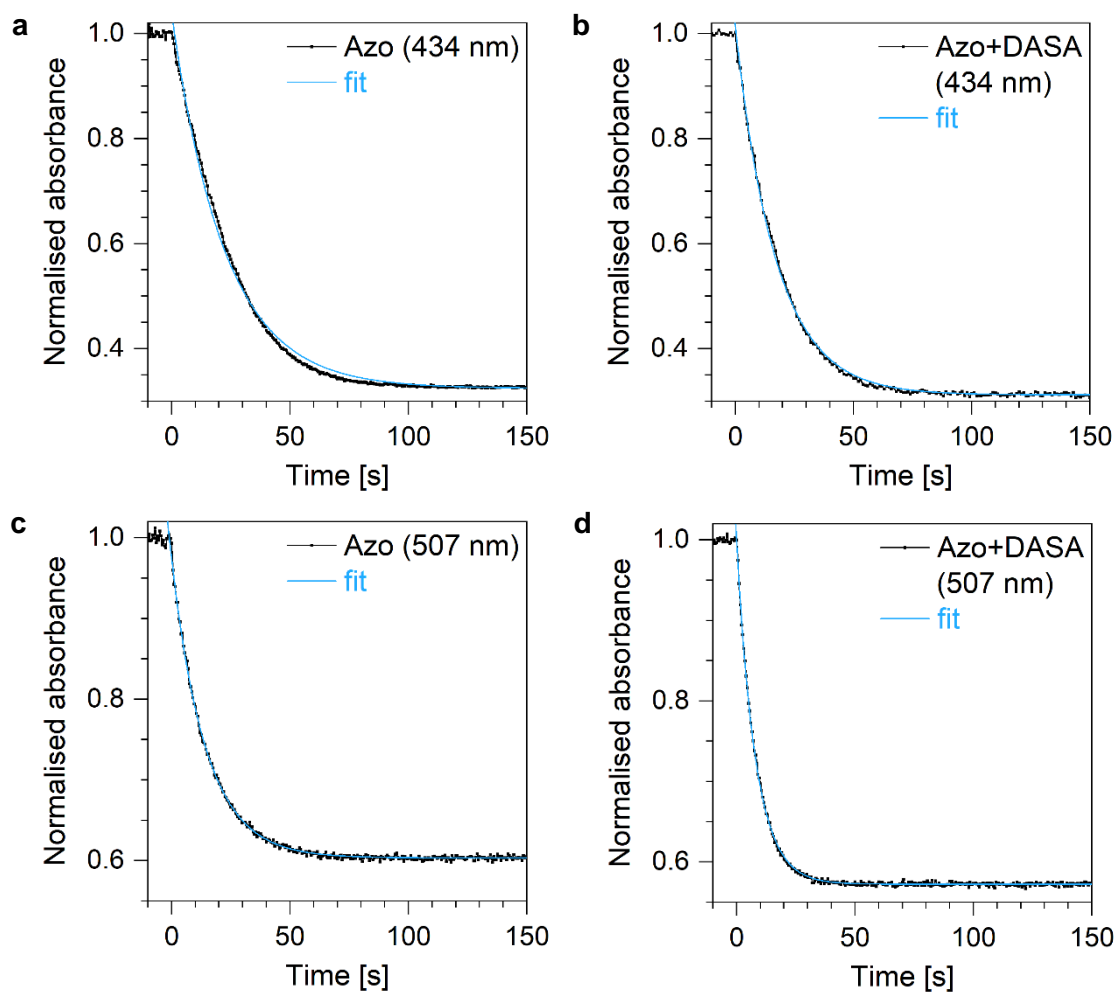

**Supplementary Figure S3** Temporal evolution of the absorption of *E*-Azo at its maximum absorption wavelength in toluene upon *E*-to-*Z* photoisomerisation and their respective monoexponential fit curves. The photoisomerisation of a (a) pure Azo solution and an (b) equimolar Azo+DASA solution using blue light for orthogonal switching (434 nm) as well as of a (c) pure Azo solution and an (d) equimolar Azo+DASA solution using green light for simultaneous switching wavelength (507 nm) is studied.

The effective cross section  $\sigma$  is calculated based on the lifetime  $\tau$  and the photon dose  $n_p$  per time  $t$  and area  $A$  according to equation 1. The photon dose  $n_p$  for a circular spot is thereby determined according to equation 2 using the Planck's quantum of action  $h$ , the speed of light in vacuum  $c_{vac}$ , the applied wavelength  $\lambda$  and the radius  $r$ .

$$\sigma = \frac{1}{\tau n_p} \quad (1)$$

$$n_p(t, A) = \frac{P(t)}{E_p A} = \frac{P(t) \lambda}{h c_{vac} \pi r^2} \quad (2)$$

**Supplementary Table S1** Lifetimes  $\tau$  of Azo in toluene upon photochemically initiated *E*-to-*Z* isomerisation, applied photon doses  $n_p$  and wavelengths  $\lambda$  for orthogonally addressing Azo or simultaneously addressing Azo and DASA as well as the resulting effective cross sections  $\sigma$  of Azo.

|                                                    | Azo orthogonally | Azo+DASA orthogonally | Azo simultaneously | Azo+DASA simultaneously |
|----------------------------------------------------|------------------|-----------------------|--------------------|-------------------------|
| $\tau$ [s]                                         | $22.41 \pm 0.10$ | $17.20 \pm 0.09$      | $14.39 \pm 0.05$   | $7.95 \pm 0.03$         |
| $n_p$ [ $10^{15} \text{ s}^{-1} \text{ cm}^{-2}$ ] | $8.6 \pm 0.4$    | $8.6 \pm 0.4$         | $72 \pm 4$         | $72 \pm 4$              |
| $\lambda$ [nm]                                     | 434              | 434                   | 507                | 507                     |
| $\sigma$ [ $10^{-18} \text{ cm}^2$ ]               | $5.21 \pm 0.26$  | $6.79 \pm 0.34$       | $0.97 \pm 0.05$    | $1.74 \pm 0.09$         |

**Supplementary Table S2** Determined lifetimes of Azo in toluene upon thermally activated *Z*-to-*E* backswitching in different environments regarding DASA.

| Temperature [°C] | Lifetime [s]     |                    |                                             |
|------------------|------------------|--------------------|---------------------------------------------|
|                  | Azo              | Azo+Z-DASA         | Azo+DASA simultaneous thermal backswitching |
| 20               | -                | $10121.5 \pm 12.1$ | $11608.3 \pm 12.7$                          |
| 25               | -                | -                  | $6281.4 \pm 5.7$                            |
| 30               | $2994.2 \pm 1.9$ | $3423.1 \pm 17.9$  | $3507.1 \pm 4.2$                            |
| 35               | -                | $1866.3 \pm 2.0$   | $1951.9 \pm 2.2$                            |
| 40               | $1105.9 \pm 1.9$ | $1178.8 \pm 0.4$   | $1106.2 \pm 0.9$                            |
| 45               | -                | $679.7 \pm 0.5$    | $667.0 \pm 0.8$                             |
| 50               | $382.6 \pm 0.7$  | -                  | -                                           |
| 60               | $138.8 \pm 0.3$  | -                  | -                                           |

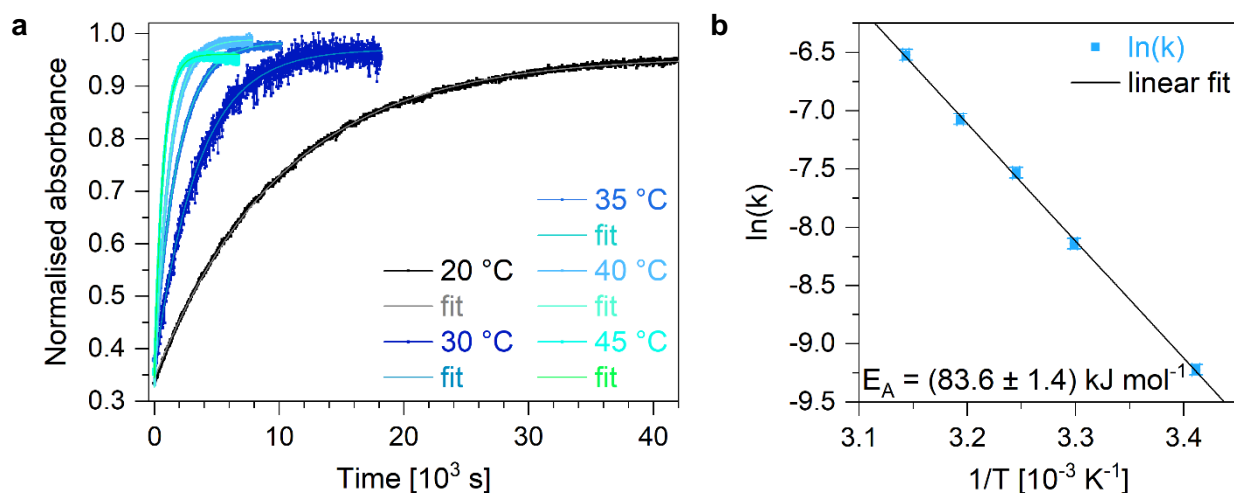

**Supplementary Figure S4** (a) Temporal evolution of the absorption of *E*-Azo at its maximum absorption wavelength upon thermally activated *Z*-to-*E* isomerisation in the presence of *Z*-DASA within an equimolar Azo+DASA mixture in toluene at different temperatures with the respective monoexponential fit curves. Using the fitted lifetimes, the corresponding rate constants are calculated and an (b) Arrhenius plot is applied to extract the activation energy of the *Z*-to-*E* isomerisation of Azo.

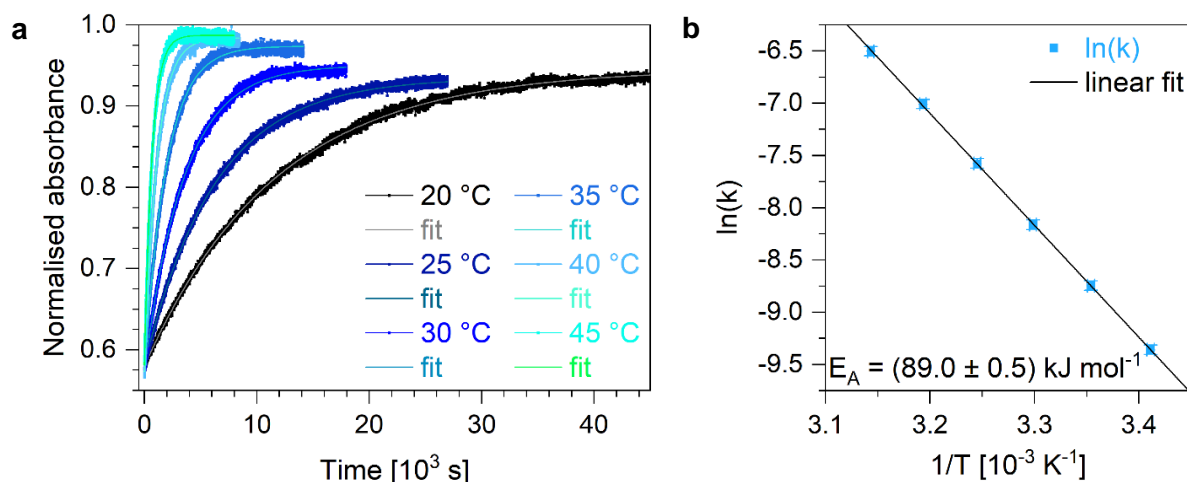

**Supplementary Figure S5** (a) Temporal evolution of the absorption of *E*-Azo at its maximum absorption wavelength upon thermally activated *Z*-to-*E* isomerisation in an equimolar Azo+DASA mixture in toluene with simultaneous closed-to-linear isomerisation of DASA at different temperatures with the respective monoexponential fit curves. Using the fitted lifetimes, the corresponding rate constants are calculated and an (b) Arrhenius plot is applied to extract the activation energy of the thermally initiated *Z*-to-*E* isomerisation of Azo.

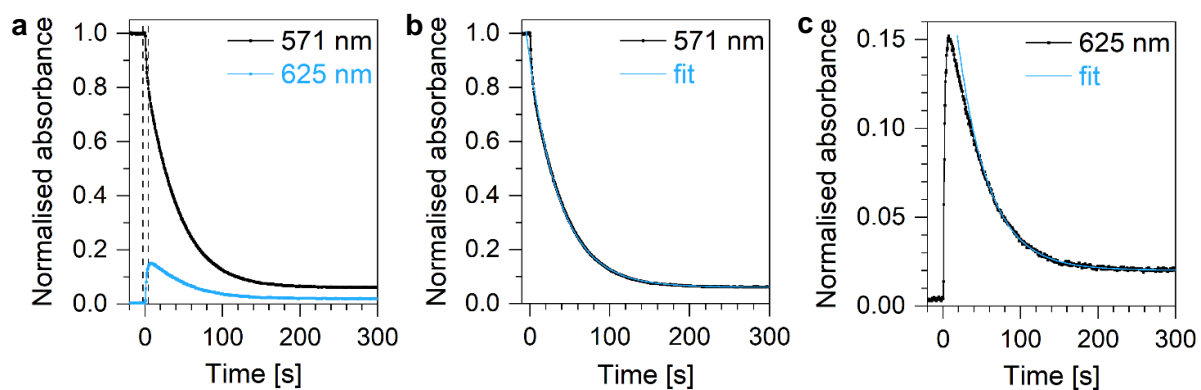

**Supplementary Figure S6** Temporal evolution of the absorption of Z-DASA at 571 nm and of E-DASA at 625 nm at 0 °C. (a) Since the rise of the absorption feature of E-DASA is orders of magnitude faster than the decay time, the decay of the Z-DASA absorption feature is pseudo monoexponential and can be used to describe the ring closure and opening which is verified by the same decay times fitted by monoexponential fit curves to the decay of (b) Z-DASA and (c) E-DASA.

**Supplementary Table S3** Determined lifetimes of DASA in toluene upon thermally activated linear-to-closed switching in different environments regarding Azo.

| Temperature [°C] | Lifetime [s] |              |                                 |
|------------------|--------------|--------------|---------------------------------|
|                  | DASA         | DASA+E-Azo   | DASA+Azo simultaneous switching |
| 0                | 39.43 ± 0.11 | -            | -                               |
| 10               | 30.87 ± 0.12 | 25.17 ± 0.05 | -                               |
| 20               | 22.87 ± 0.09 | 17.68 ± 0.03 | 17.91 ± 0.02                    |
| 25               | -            | -            | 15.39 ± 0.02                    |
| 30               | 18.97 ± 0.06 | 16.59 ± 0.04 | 13.00 ± 0.02                    |
| 35               | -            | -            | 11.23 ± 0.01                    |
| 40               | 17.17 ± 0.04 | 12.75 ± 0.02 | 10.15 ± 0.03                    |
| 45               | -            | -            | 8.87 ± 0.03                     |

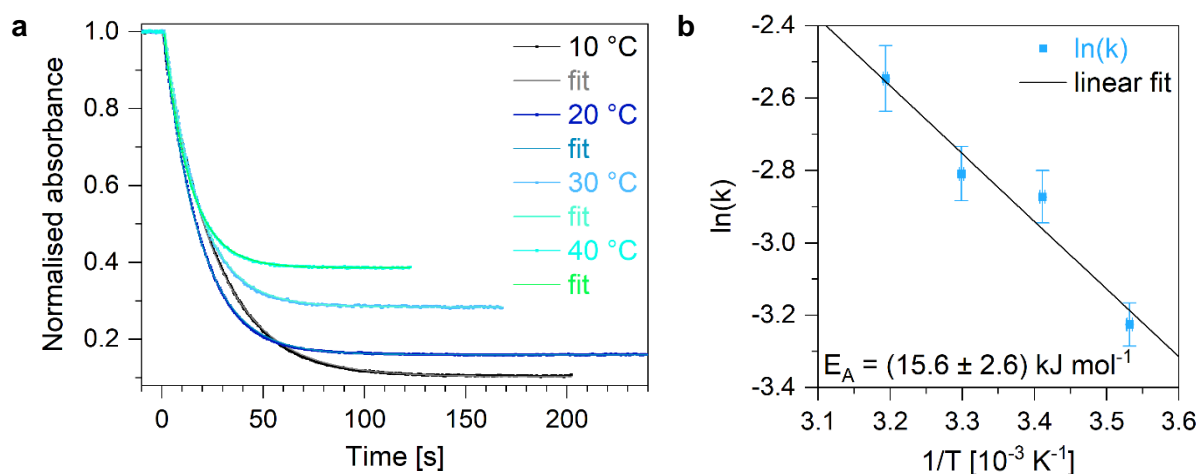

**Supplementary Figure S7** (a) Temporal evolution of the absorption of Z-DASA at its maximum absorption wavelength upon linear-to-closed switching in an equimolar Azo+DASA mixture in toluene in the presence of E-Azo at different temperatures with the respective monoexponential fit curves. Using the fitted lifetimes, the corresponding rate constants are calculated and an (b) Arrhenius plot is applied to extract the activation energy of the thermally activated ring closure of DASA.



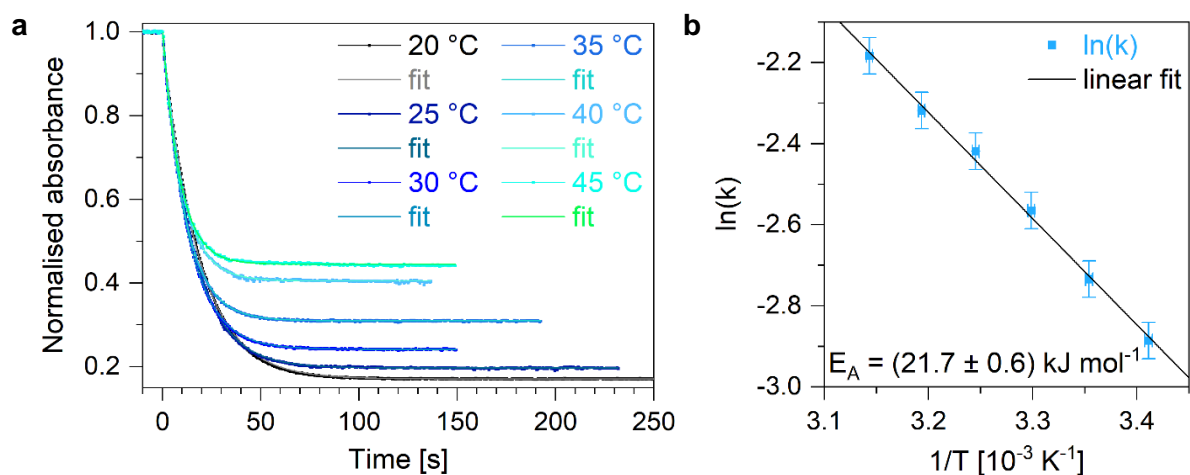

**Supplementary Figure S8** (a) Temporal evolution of the absorption of Z-DASA at its maximum absorption wavelength upon linear-to-closed switching in an equimolar DASA+Azo mixture in toluene while Azo undergoes simultaneous *E*-to-*Z* isomerisation at different temperatures with the respective monoexponential fit curves. Using the fitted lifetimes, the corresponding rate constants are calculated and an (b) Arrhenius plot is applied to extract the activation energy of the thermally activated ring closure of DASA.

**Supplementary Table S4** Effective cross sections  $\sigma$  of DASA in toluene upon open-to-closed isomerisation based on the lifetimes  $\tau$  of DASA of **Supplementary Table 3**, applied photon dose  $n_p$  and wavelength  $\lambda$  for orthogonally addressing DASA or simultaneously addressing DASA and Azo.

| Temperature [°C] | Effective cross section $\sigma$ [ $10^{-18}$ cm $^2$ ]                                                                                                                                             |                 |                                 |
|------------------|-----------------------------------------------------------------------------------------------------------------------------------------------------------------------------------------------------|-----------------|---------------------------------|
|                  | Based on $\lambda = 594$ nm and $n_p = (20 \pm 1) \cdot 10^{15}$ s $^{-1}$ cm $^{-2}$ or<br>$\lambda = 507$ nm and $n_p = (72 \pm 4) \cdot 10^{15}$ s $^{-1}$ cm $^{-2}$ for simultaneous switching |                 |                                 |
|                  | DASA                                                                                                                                                                                                | DASA+E-Azo      | DASA+Azo simultaneous switching |
| 0                | $1.24 \pm 0.06$                                                                                                                                                                                     | -               | -                               |
| 10               | $1.58 \pm 0.08$                                                                                                                                                                                     | $1.94 \pm 0.10$ | -                               |
| 20               | $2.14 \pm 0.11$                                                                                                                                                                                     | $2.77 \pm 0.14$ | $0.77 \pm 0.04$                 |
| 25               | -                                                                                                                                                                                                   | -               | $0.90 \pm 0.05$                 |
| 30               | $2.58 \pm 0.13$                                                                                                                                                                                     | $2.95 \pm 0.15$ | $1.07 \pm 0.05$                 |
| 35               | -                                                                                                                                                                                                   | -               | $1.23 \pm 0.06$                 |
| 40               | $2.85 \pm 0.14$                                                                                                                                                                                     | $3.83 \pm 0.19$ | $1.36 \pm 0.07$                 |
| 45               | -                                                                                                                                                                                                   | -               | $1.56 \pm 0.08$                 |

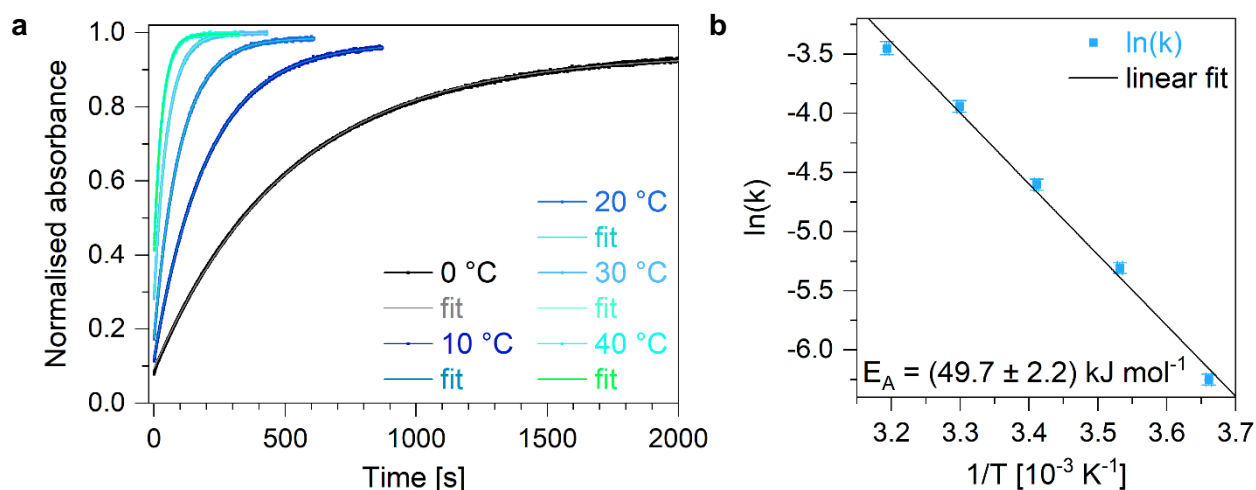

**Supplementary Figure S9** (a) Temporal evolution of the absorption of Z-DASA at its maximum absorption wavelength upon closed-to-linear backswitching of DASA in toluene at different temperatures with the respective monoexponential fit curves. Using the fitted lifetimes, the corresponding rate constants are calculated and an (b) Arrhenius plot is applied to extract the activation energy for the thermally activated ring opening of DASA.

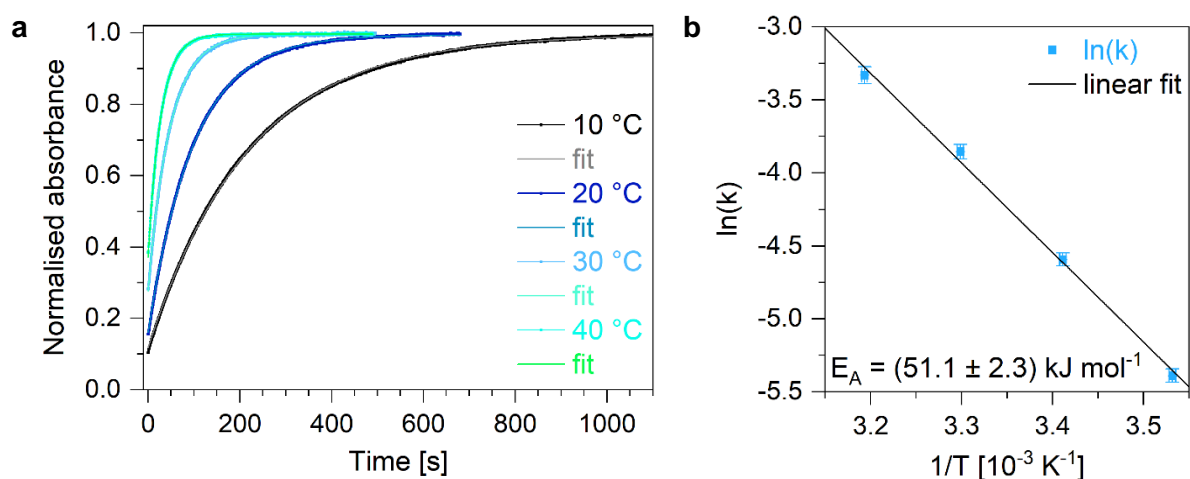

**Supplementary Figure S10** (a) Temporal evolution of the absorption of Z-DASA at its maximum absorption wavelength upon closed-to-linear backswitching of DASA in an equimolar DASA+Azo mixture in toluene while *E*-Azo is present at different temperatures with the respective monoexponential fit curves. Using the fitted lifetimes, the corresponding rate constants are calculated and an (b) Arrhenius plot is applied to extract the activation energy for the thermally activated ring opening of DASA.

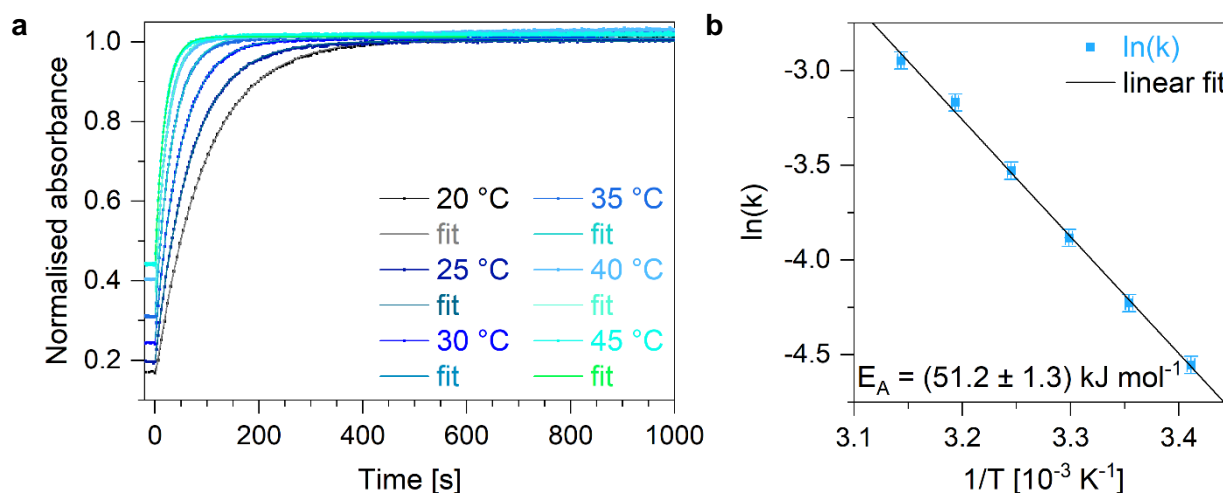

**Supplementary Figure S11** (a) Temporal evolution of the first 1000 s of the absorption of Z-DASA at its maximum absorption wavelength upon closed-to-linear backswitching of DASA in an equimolar Azo+DASA mixture in toluene at different temperatures with the respective monoexponential fit curves. Using the fitted lifetimes, the corresponding rate constants are calculated and an (b) Arrhenius plot is applied to extract the activation energy for the thermally activated ring opening of DASA.

**Supplementary Table S5** Determined lifetimes of DASA in toluene upon thermally activated closed-to-open isomerisation in different environments regarding Azo.

| Temperature [°C] | Lifetime [s]  |               |                                 |
|------------------|---------------|---------------|---------------------------------|
|                  | DASA          | DASA+E-Azo    | DASA+Azo simultaneous switching |
| 0                | 518.63 ± 0.26 | -             | -                               |
| 10               | 202.17 ± 0.10 | 218.98 ± 0.14 | -                               |
| 20               | 99.71 ± 0.06  | 98.76 ± 0.07  | 94.97 ± 0.21                    |
| 25               | -             | -             | 68.51 ± 0.15                    |
| 30               | 51.53 ± 0.05  | 47.15 ± 0.04  | 48.58 ± 0.09                    |
| 35               | -             | -             | 34.09 ± 0.14                    |
| 40               | 31.53 ± 0.04  | 27.97 ± 0.03  | 23.78 ± 0.11                    |
| 45               | -             | -             | 19.06 ± 0.07                    |

#### 4. IR absorption data

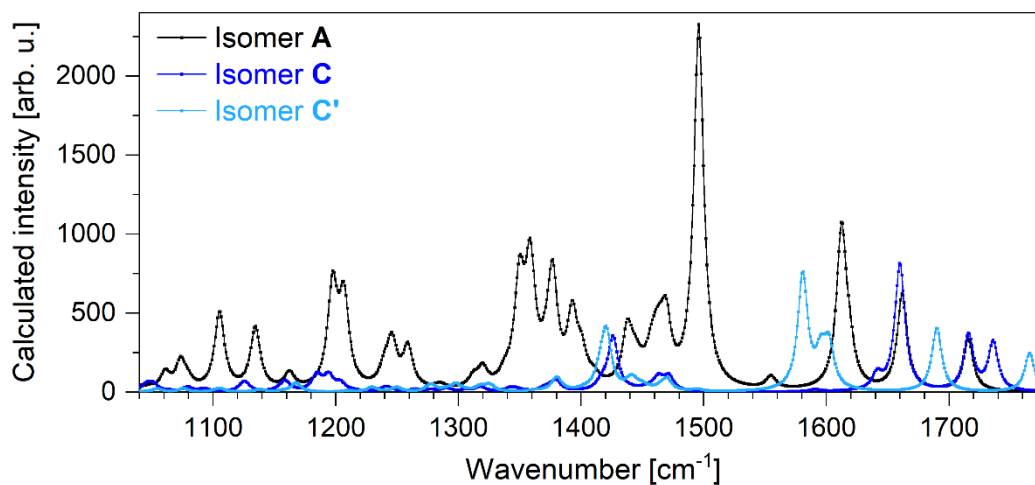

**Supplementary Figure S12** IR absorption spectra calculated by density functional theory (DFT) using the B3LYP functional, the 6-311G(d,p) basis set, a scaling factor of 0.9682 and applying a FWHM of  $5 \text{ cm}^{-1}$ .

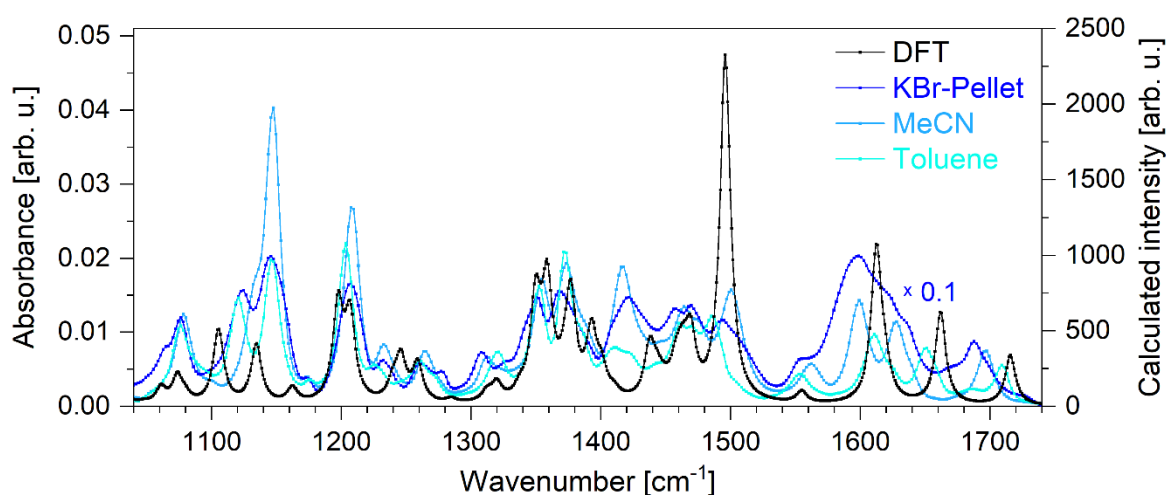

**Supplementary Figure S13** Comparison of the IR absorption spectra of Z-DASA in different environments and the calculated absorption bands considering a scaling factor of 0.9682. Small shifts are observed but the absorption bands can be related to each other in order to assign the observed modes to the underlying vibrations.

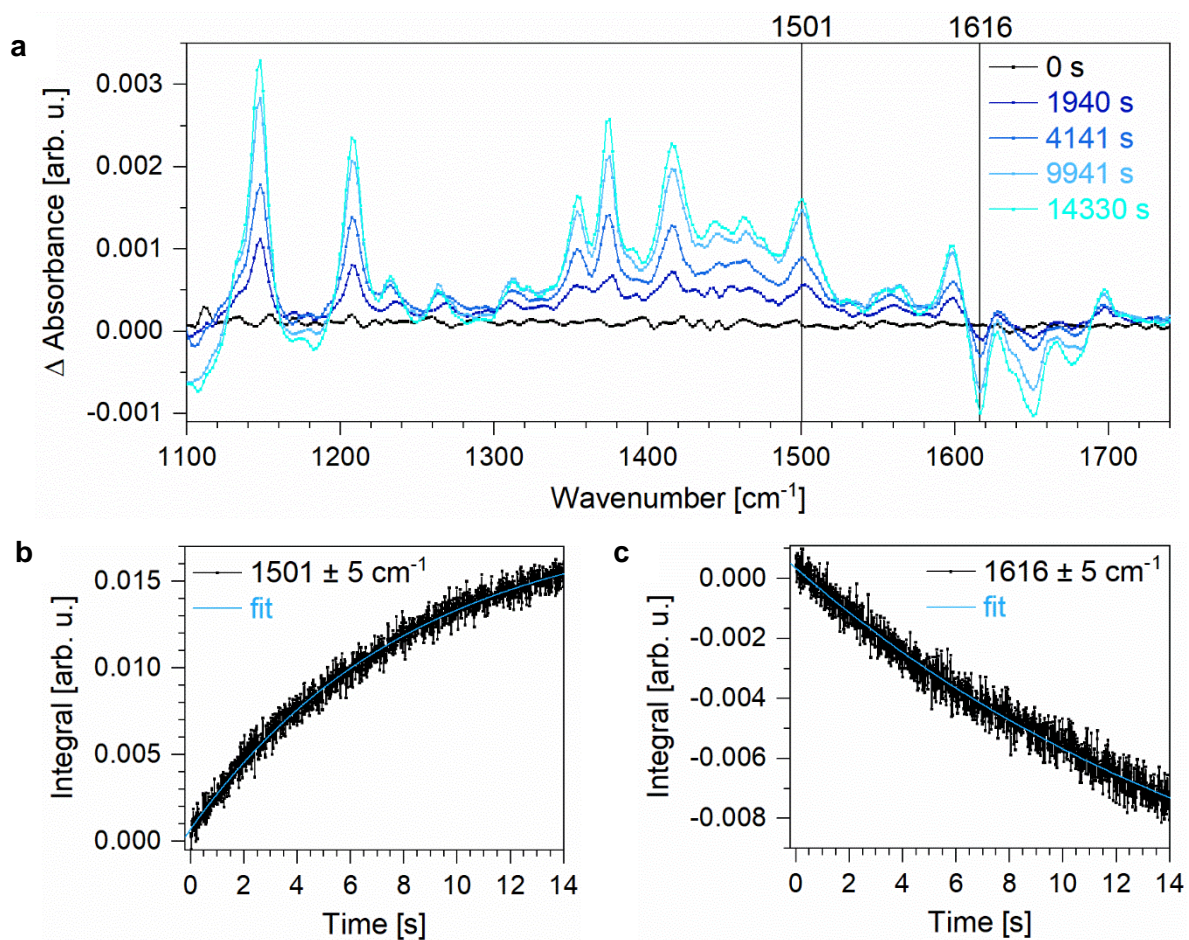

**Supplementary Figure S14** (a) Changes in IR absorption upon closed-to-linear backswitching of DASA in acetonitrile- $d_3$  at room temperature. IR absorption bands related to the closed zwitterionic  $C'$  isomer, e.g. at (b)  $1616 \text{ cm}^{-1}$ , disappear while new absorption bands of the linear  $Z$ -DASA isomer, e.g. at (c)  $1501 \text{ cm}^{-1}$ , emerge.

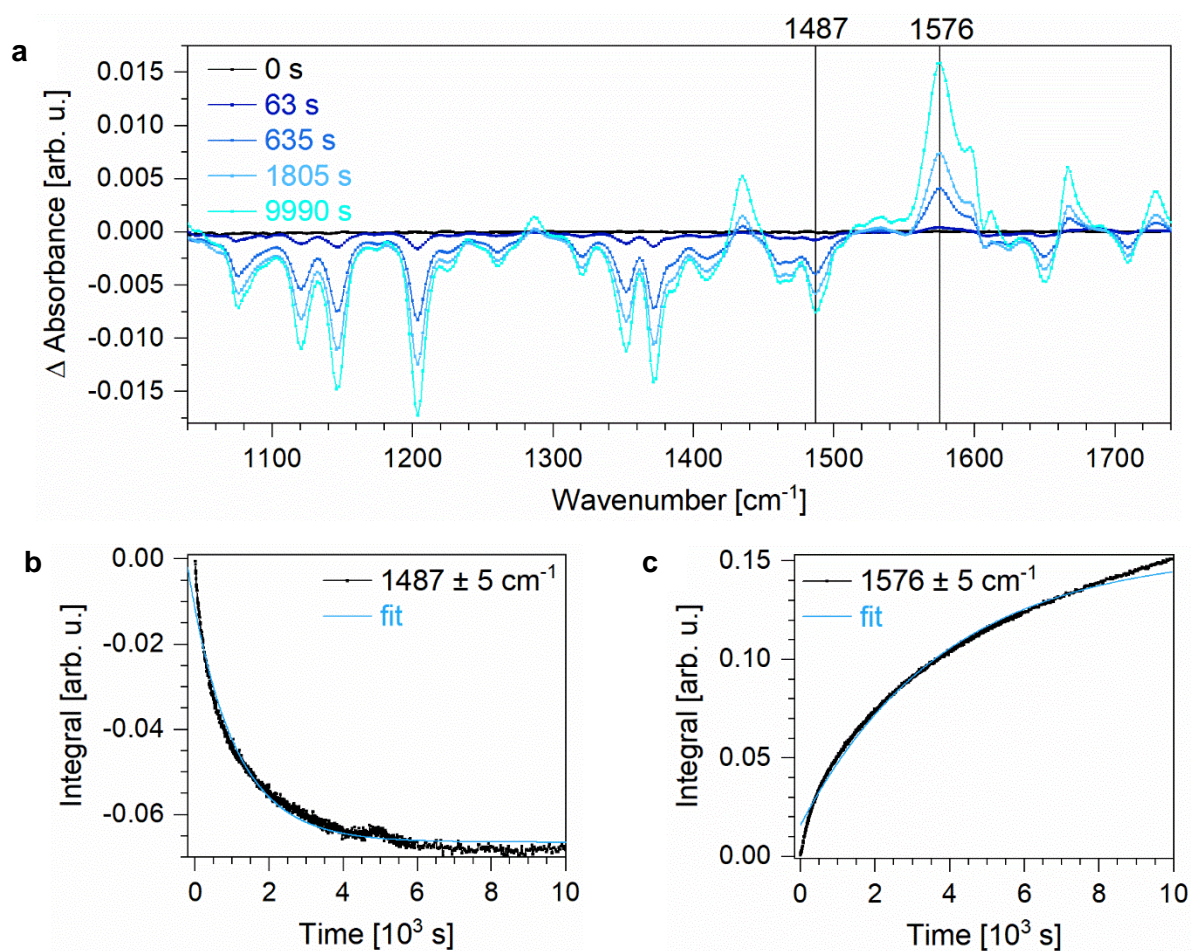

**Supplementary Figure S15** (a) Changes in IR absorption upon linear-to-closed switching of DASA in toluene-d<sub>8</sub> at room temperature. IR absorption bands related to the linear species, e.g. at (b) 1487  $\text{cm}^{-1}$ , disappear while new absorption bands of the closed isomers C and C', e.g. at (c) 1576  $\text{cm}^{-1}$ , emerge.

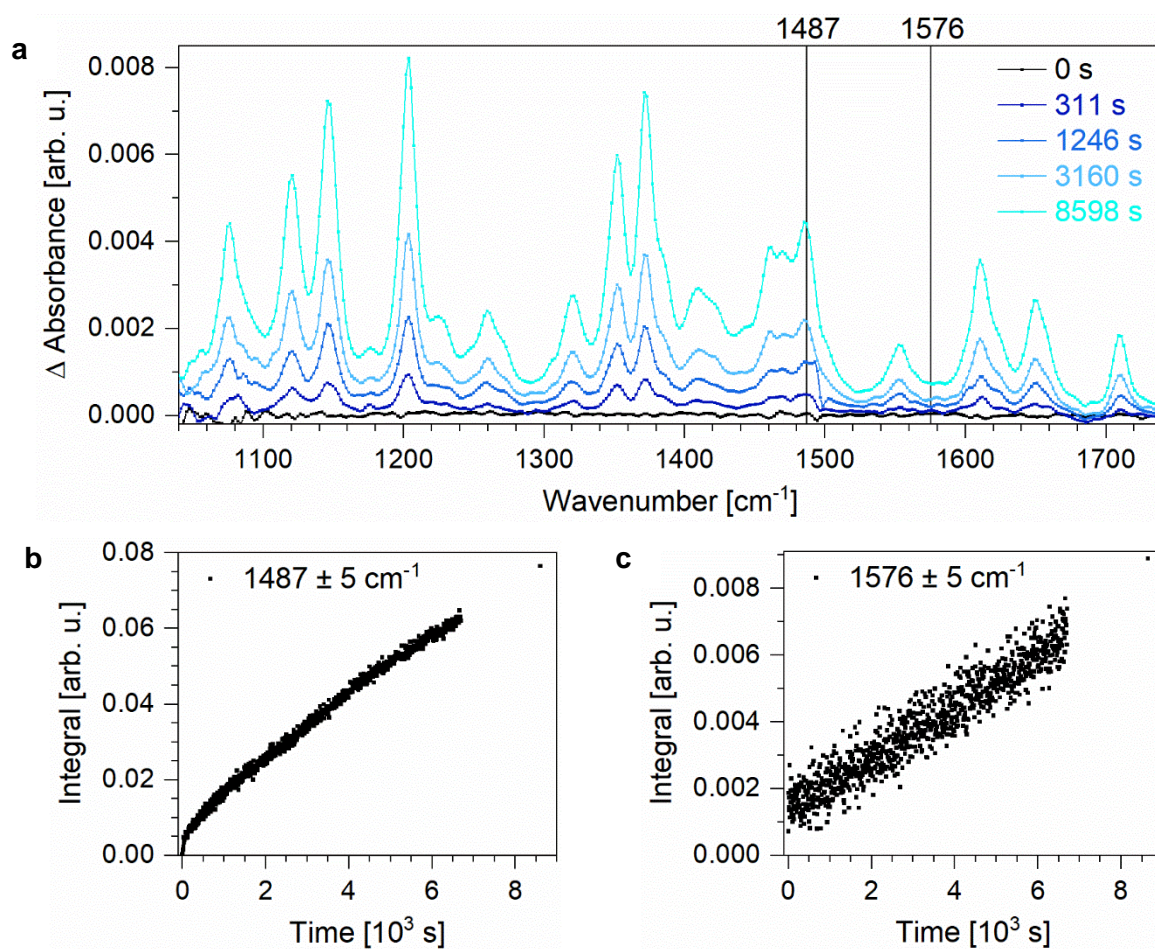

**Supplementary Figure S16** (a) Changes in IR absorption upon closed-to-linear backswitching of DASA in toluene- $d_8$ . IR absorption bands related to the closed zwitterionic isomer  $C'$ , e.g. at (b)  $1576 \text{ cm}^{-1}$ , and new absorption bands of the linear Z-DASA isomer, e.g. at (c)  $1487 \text{ cm}^{-1}$ , grow linearly in intensity.

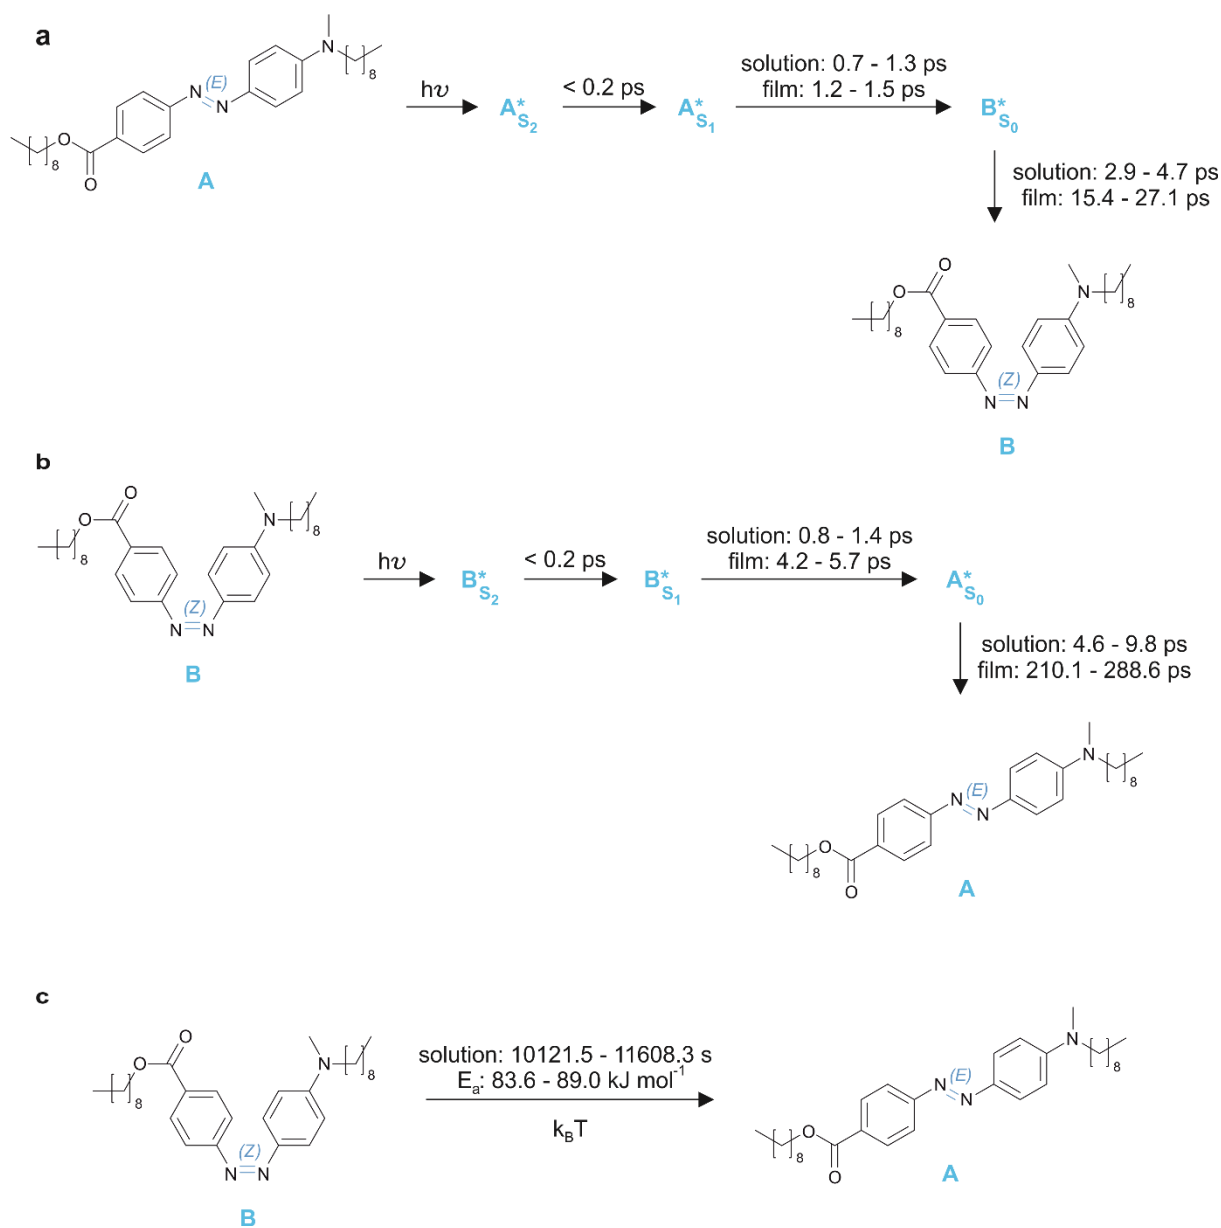

**Supplementary Figure S17** Complete switching scheme of the (a) *E*-to-*Z*, (b) photoinitiated *Z*-to-*E* and (c) thermally activated *Z*-to-*E* switching of Azo including the determined lifetimes and activation energies found for pure Azo solutions and in an equimolar mixture of Azo+DASA in different environments, namely toluene solutions, acetonitrile solutions and thin PMMA blend films. The lifetimes in the picosecond range were determined within our former study of the ultrafast kinetics<sup>2</sup> while the longer lifetimes and activation energies are provided by this study.



## 5. Theory

The optimised geometries shown in **Fehler! Verweisquelle konnte nicht gefunden werden.** demonstrate the good agreement between the reaction coordinates along which the isomerisation of DASA isomer B to DASA isomer B' happens and along which the ring closure from DASA isomer B' to DASA isomer C takes place.

The calculated geometries of the DASA isomers and transition states are listed in the

Supplementary Table S1 - Supplementary Table Supplementary Table 7 whereas the Azo isomers and transition states are listed in the Supplementary Table 8 - Supplementary Table Supplementary Table 10.

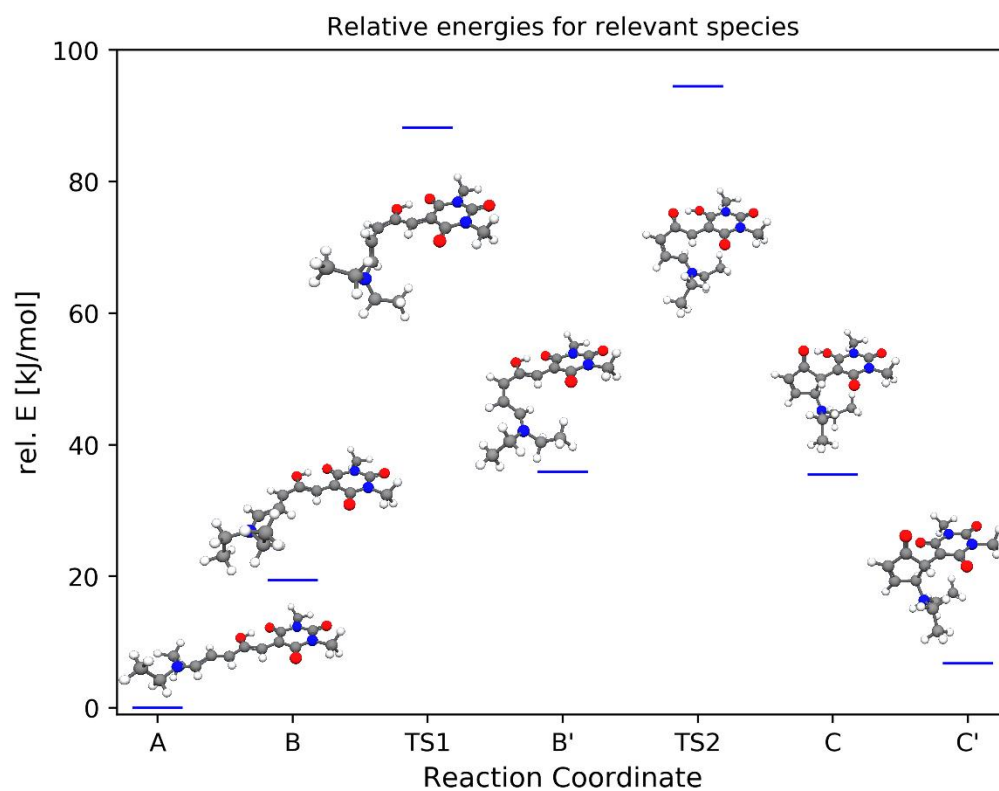

**Supplementary Figure 18** Relative energies of all explicitly considered species relative to the DASA isomer A.

**Supplementary Table S1** Optimised geometry of the DASA isomer A using DFT theory, the range-separated hybrid exchange-correlation (xc)-functional  $\omega$ B97X-D3 and the 6-311G(d,p) basis-set.

| No. | Atom | x             | y             | z             |
|-----|------|---------------|---------------|---------------|
| 1   | C    | 4.9130533446  | -0.0687760176 | -0.0548768356 |
| 2   | N    | 4.3449725069  | 1.1760882271  | 0.1017562016  |
| 3   | C    | 2.9659589075  | 1.4206729865  | 0.1647477830  |
| 4   | C    | 2.0960974368  | 0.2696358663  | 0.0436331581  |
| 5   | C    | 2.6588877076  | -1.0336352853 | -0.1213431245 |
| 6   | N    | 4.0445950318  | -1.1410160054 | -0.1627327303 |
| 7   | C    | 0.7082235339  | 0.5531667153  | 0.1032257330  |
| 8   | C    | -0.4378814633 | -0.2116466589 | 0.0122757004  |
| 9   | O    | -0.5027944291 | -1.5543859874 | -0.1731904304 |
| 10  | O    | 2.5688880722  | 2.5726314345  | 0.3134040378  |
| 11  | O    | 2.0145246238  | -2.0910131763 | -0.2297494757 |
| 12  | C    | 5.2763885885  | 2.2964294761  | 0.2074342028  |
| 13  | C    | 4.6089078688  | -2.4784956811 | -0.3350742254 |
| 14  | O    | 6.1230887190  | -0.2078459566 | -0.0979837325 |
| 15  | C    | -1.6719362484 | 0.4624090811  | 0.1106983734  |
| 16  | C    | -2.9063388287 | -0.1497767826 | 0.0239386155  |
| 17  | C    | -4.0609687754 | 0.6327430309  | 0.1325954662  |
| 18  | N    | -5.3055095284 | 0.2218655874  | 0.0549551046  |
| 19  | C    | -5.6540102739 | -1.1856080549 | -0.1668591626 |
| 20  | C    | -5.6834013237 | -1.9782216414 | 1.1343688078  |
| 21  | C    | -6.4149102021 | 1.1745112257  | 0.1929751605  |
| 22  | C    | -6.9570461213 | 1.6242610179  | -1.1570991606 |
| 23  | H    | 0.4250655726  | -1.8931918410 | -0.2122279496 |
| 24  | H    | -7.7921758297 | 2.3116683273  | -1.0051174272 |
| 25  | H    | -7.3176634726 | 0.7770337946  | -1.7457381783 |
| 26  | H    | -6.1823849348 | 2.1413423462  | -1.7286593813 |
| 27  | H    | -7.1927982031 | 0.6852294193  | 0.7842533516  |
| 28  | H    | -6.0532768195 | 2.0276368615  | 0.7689206867  |
| 29  | H    | -5.9563795804 | -3.0149184113 | 0.9256394277  |
| 30  | H    | -4.7053840679 | -1.9719452865 | 1.6212972835  |
| 31  | H    | -6.4190693549 | -1.5624362473 | 1.8273620450  |
| 32  | H    | -6.6329280147 | -1.2012628926 | -0.6486453908 |
| 33  | H    | -4.9421429862 | -1.6124852332 | -0.8755207283 |
| 34  | H    | -3.9417673856 | 1.7008794064  | 0.3019332188  |
| 35  | H    | -2.9626129641 | -1.2208635374 | -0.1241970629 |
| 36  | H    | -1.6298683288 | 1.5373748158  | 0.2616252376  |
| 37  | H    | 0.5104651704  | 1.6101787001  | 0.2483334058  |
| 38  | H    | 5.9088828147  | 2.1785726706  | 1.0881213645  |
| 39  | H    | 4.6884968911  | 3.2047176163  | 0.2921633455  |
| 40  | H    | 5.6890460171  | -2.3828156950 | -0.3753379346 |
| 41  | H    | 4.2378968159  | -2.9196596516 | -1.2601165728 |
| 42  | H    | 4.3222932302  | -3.1162397440 | 0.5016212522  |
| 43  | H    | 5.9067922839  | 2.3413992272  | -0.6809497595 |

Absolute energy = 1049.42790355860 Eh

**Supplementary Table 2** Optimised geometry of the DASA isomer B using DFT theory, the range-separated hybrid exchange-correlation (xc)-functional  $\omega$ B97X-D3 and the 6-311G(d,p) basis-set.

| No.                                  | Atom | x             | y             | z             |
|--------------------------------------|------|---------------|---------------|---------------|
| 1                                    | C    | 4.9455644884  | 0.2306075196  | 0.0888037260  |
| 2                                    | N    | 4.2842884171  | 1.4235241609  | 0.2790783773  |
| 3                                    | C    | 2.8904851631  | 1.5737450772  | 0.2601058304  |
| 4                                    | C    | 2.1105572849  | 0.3807978876  | 0.0053761504  |
| 5                                    | C    | 2.7716891207  | -0.8705198806 | -0.1971325985 |
| 6                                    | N    | 4.1619418064  | -0.8838904865 | -0.1518056616 |
| 7                                    | C    | 0.7049535008  | 0.5743221568  | -0.0056776204 |
| 8                                    | C    | -0.3821143501 | -0.2417037802 | -0.2291021968 |
| 9                                    | O    | -0.3370412502 | -1.5721166268 | -0.5296198864 |
| 10                                   | O    | 2.4065572360  | 2.6854974763  | 0.4551683807  |
| 11                                   | O    | 2.2121675846  | -1.9598021326 | -0.4071486674 |
| 12                                   | C    | 5.1262357554  | 2.5906946416  | 0.5274756756  |
| 13                                   | C    | 4.8257647334  | -2.1695829528 | -0.3594362369 |
| 14                                   | O    | 6.1622404502  | 0.1712254418  | 0.1315896410  |
| 15                                   | C    | -1.6976904637 | 0.2784417888  | -0.1685926988 |
| 16                                   | C    | -2.1355701955 | 1.5575091712  | 0.1091520655  |
| 17                                   | C    | -3.5135710513 | 1.7992084847  | 0.1014953870  |
| 18                                   | N    | -4.1193105189 | 2.9368546594  | 0.3522722099  |
| 19                                   | C    | -3.3844103698 | 4.1638853250  | 0.6761551730  |
| 20                                   | C    | -2.9392048493 | 4.9054269831  | -0.5784558513 |
| 21                                   | C    | -5.5851764435 | 3.0216177260  | 0.3105352938  |
| 22                                   | C    | -6.2064081720 | 2.8893194878  | 1.6942500726  |
| 23                                   | H    | 0.6103732523  | -1.8473441302 | -0.5121247904 |
| 24                                   | H    | -7.2925283169 | 2.9774745457  | 1.6176341101  |
| 25                                   | H    | -5.8499554736 | 3.6710058422  | 2.3696818518  |
| 26                                   | H    | -5.9672845983 | 1.9162768026  | 2.1303233640  |
| 27                                   | H    | -5.8440670515 | 3.9798728585  | -0.1461792512 |
| 28                                   | H    | -5.9461056290 | 2.2345955247  | -0.3533713562 |
| 29                                   | H    | -2.4120686953 | 5.8196399258  | -0.2976589588 |
| 30                                   | H    | -2.2658624360 | 4.2905086120  | -1.1804481894 |
| 31                                   | H    | -3.7999327371 | 5.1797047073  | -1.1935040432 |
| 32                                   | H    | -4.0492356058 | 4.7873085476  | 1.2760809693  |
| 33                                   | H    | -2.5338209712 | 3.9056190958  | 1.3094200754  |
| 34                                   | H    | -4.1770991224 | 0.9707517777  | -0.1362737888 |
| 35                                   | H    | -1.4420638046 | 2.3599243142  | 0.3281122517  |
| 36                                   | H    | -2.4669150989 | -0.4650216961 | -0.3765884201 |
| 37                                   | H    | 0.4472403076  | 1.6063869199  | 0.2051673371  |
| 38                                   | H    | 5.6871052739  | 2.4619642542  | 1.4542343975  |
| 39                                   | H    | 4.4735685154  | 3.4538496156  | 0.6080597179  |
| 40                                   | H    | 5.8974339734  | -2.0006958882 | -0.3353646508 |
| 41                                   | H    | 4.5332590607  | -2.5838430677 | -1.3240376974 |
| 42                                   | H    | 4.5416359078  | -2.8695480404 | 0.4270263355  |
| 43                                   | H    | 5.8269653727  | 2.7277773505  | -0.2962458292 |
| Absolute energy =1049.41982182549 Eh |      |               |               |               |

**Supplementary Table 3** Optimised geometry of the transition state TS1 using DFT theory, the range-separated hybrid exchange-correlation (xc)-functional  $\omega$ B97X-D3 and the 6-311G(d,p) basis-set.

| No.                                   | Atom | x             | y             | z             |
|---------------------------------------|------|---------------|---------------|---------------|
| 1                                     | C    | 4.2134615330  | 0.4283503592  | 0.7950128360  |
| 2                                     | N    | 3.3491024929  | 1.4809081837  | 1.0411626205  |
| 3                                     | C    | 2.0317665463  | 1.5414289252  | 0.6148734598  |
| 4                                     | C    | 1.5321298746  | 0.3736808744  | -0.1530905874 |
| 5                                     | C    | 2.4335989550  | -0.7542974651 | -0.4071146996 |
| 6                                     | N    | 3.7155051562  | -0.6573134149 | 0.0761020108  |
| 7                                     | C    | 0.2382125237  | 0.4690379686  | -0.5580825137 |
| 8                                     | C    | -0.6929260242 | -0.3894750322 | -1.2631851583 |
| 9                                     | O    | -0.3836271981 | -1.6348850899 | -1.6847033577 |
| 10                                    | O    | 1.3392549275  | 2.5073765983  | 0.8713814291  |
| 11                                    | O    | 2.1163025007  | -1.7678745959 | -1.0232319599 |
| 12                                    | C    | 3.9046579248  | 2.5939962509  | 1.8135322251  |
| 13                                    | C    | 4.6120285440  | -1.7866475611 | -0.1844342960 |
| 14                                    | O    | 5.3552247204  | 0.4553597602  | 1.1945425883  |
| 15                                    | C    | -1.9488898837 | 0.0748535461  | -1.4687588962 |
| 16                                    | C    | -2.4468057612 | 1.4277135048  | -1.1400605836 |
| 17                                    | C    | -3.1798733306 | 1.6716014836  | -0.0372422905 |
| 18                                    | N    | -3.7437701485 | 2.8573308385  | 0.3569755019  |
| 19                                    | C    | -3.4875280961 | 4.0613209809  | -0.4216772624 |
| 20                                    | C    | -4.3885785783 | 4.1681448800  | -1.6488680730 |
| 21                                    | C    | -4.0007129281 | 3.0241312079  | 1.7842297787  |
| 22                                    | C    | -2.7547003494 | 3.3854949200  | 2.5908098191  |
| 23                                    | H    | 0.5606734573  | -1.8130570828 | -1.4855335534 |
| 24                                    | H    | -2.9985402237 | 3.4882094169  | 3.6516591047  |
| 25                                    | H    | -2.3263468151 | 4.3322187694  | 2.2489419505  |
| 26                                    | H    | -1.9901869584 | 2.6094747220  | 2.4863971207  |
| 27                                    | H    | -4.7671916182 | 3.7954334155  | 1.9028298862  |
| 28                                    | H    | -4.4309979804 | 2.0902545617  | 2.1577265936  |
| 29                                    | H    | -4.1557117161 | 5.0748925037  | -2.2138040891 |
| 30                                    | H    | -4.2602361027 | 3.3122134705  | -2.3156018229 |
| 31                                    | H    | -5.4380880677 | 4.2100846968  | -1.3459800749 |
| 32                                    | H    | -3.6606391570 | 4.9202600489  | 0.2307231506  |
| 33                                    | H    | -2.4294228383 | 4.1010589985  | -0.7182613393 |
| 34                                    | H    | -3.3752397830 | 0.8525906910  | 0.6531994231  |
| 35                                    | H    | -2.2247475517 | 2.2197715450  | -1.8503958899 |
| 36                                    | H    | -2.6236663707 | -0.6246121289 | -1.9639114317 |
| 37                                    | H    | -0.2287749202 | 1.4049543980  | -0.2660733874 |
| 38                                    | H    | 4.2619072273  | 2.2303591743  | 2.7764598809  |
| 39                                    | H    | 3.1127526304  | 3.3210634158  | 1.9604921851  |
| 40                                    | H    | 5.5759069111  | -1.5587153216 | 0.2573935128  |
| 41                                    | H    | 4.7169159403  | -1.9303288818 | -1.2595712685 |
| 42                                    | H    | 4.1989924416  | -2.6910228400 | 0.2617764800  |
| 43                                    | H    | 4.7323331053  | 3.0480979059  | 1.2689866684  |
| Absolute energy = 1049.39565425714 Eh |      |               |               |               |

**Supplementary Table 4** Optimised geometry of the DASA isomer B' using DFT theory, the range-separated hybrid exchange-correlation (xc)-functional  $\omega$ B97X-D3 and the 6-311G(d,p) basis-set.

| No.                                   | Atom | x             | y             | z             |
|---------------------------------------|------|---------------|---------------|---------------|
| 1                                     | C    | 5.1114206276  | 0.0125973088  | -0.2090774504 |
| 2                                     | N    | 4.5590038141  | 1.2658047068  | -0.3527283329 |
| 3                                     | C    | 3.1838999723  | 1.5391435382  | -0.3096841874 |
| 4                                     | C    | 2.3046048759  | 0.4132033380  | -0.1169686892 |
| 5                                     | C    | 2.8466823928  | -0.8938073816 | 0.0431453446  |
| 6                                     | N    | 4.2308922437  | -1.0346350114 | -0.0102867752 |
| 7                                     | C    | 0.9167042819  | 0.7359819006  | -0.0349682879 |
| 8                                     | C    | -0.2331168301 | -0.0208561147 | 0.0113976533  |
| 9                                     | O    | -0.2981118212 | -1.3695367964 | -0.1337339893 |
| 10                                    | O    | 2.8021360568  | 2.7037262471  | -0.4293084067 |
| 11                                    | O    | 2.1872560446  | -1.9331998710 | 0.2326142326  |
| 12                                    | C    | 5.5009810904  | 2.3628025493  | -0.5559329908 |
| 13                                    | C    | 4.7755623743  | -2.3804668101 | 0.1567424956  |
| 14                                    | O    | 6.3190763368  | -0.1527782994 | -0.2553086109 |
| 15                                    | C    | -1.5053666397 | 0.6187201769  | 0.0944132901  |
| 16                                    | C    | -1.7809984956 | 1.8370315884  | 0.6608747131  |
| 17                                    | C    | -0.8827857552 | 2.4628739428  | 1.5557545631  |
| 18                                    | N    | -0.9119632430 | 3.7108179427  | 1.9411861435  |
| 19                                    | C    | -1.8479635195 | 4.6929123949  | 1.3814638285  |
| 20                                    | C    | -3.1353677644 | 4.7724132935  | 2.1928663640  |
| 21                                    | C    | 0.0529805580  | 4.1941834021  | 2.9409433145  |
| 22                                    | C    | 1.2910902600  | 4.7824764672  | 2.2780065928  |
| 23                                    | H    | 0.6239014876  | -1.7177821762 | -0.0429331712 |
| 24                                    | H    | 1.9891008435  | 5.1241841515  | 3.0452774988  |
| 25                                    | H    | 1.0353142035  | 5.6360786481  | 1.6453140775  |
| 26                                    | H    | 1.7919038324  | 4.0320842285  | 1.6605032843  |
| 27                                    | H    | -0.4588321774 | 4.9357660593  | 3.5577939701  |
| 28                                    | H    | 0.3153505544  | 3.3541114526  | 3.5852098111  |
| 29                                    | H    | -3.7884990021 | 5.5372964770  | 1.7677790842  |
| 30                                    | H    | -3.6683695474 | 3.8187825158  | 2.1818885609  |
| 31                                    | H    | -2.9262213285 | 5.0396336200  | 3.2315908594  |
| 32                                    | H    | -1.3351384437 | 5.6564245343  | 1.3764616675  |
| 33                                    | H    | -2.0468303811 | 4.4247003030  | 0.3426171856  |
| 34                                    | H    | -0.1133444252 | 1.8525804020  | 2.0221310838  |
| 35                                    | H    | -2.7468669327 | 2.2923146395  | 0.4749340405  |
| 36                                    | H    | -2.3320074633 | 0.0646819947  | -0.3461402021 |
| 37                                    | H    | 0.7481062847  | 1.8040999079  | -0.1015663521 |
| 38                                    | H    | 6.1724682544  | 2.4450073945  | 0.2995595483  |
| 39                                    | H    | 4.9221385668  | 3.2747903748  | -0.6609323666 |
| 40                                    | H    | 5.8579633554  | -2.3094011708 | 0.1253878071  |
| 41                                    | H    | 4.4224762323  | -3.0303002332 | -0.6447057439 |
| 42                                    | H    | 4.4549441422  | -2.7929737706 | 1.1132676200  |
| 43                                    | H    | 6.0912450835  | 2.1885021345  | -1.4560890783 |
| Absolute energy = 1049.41711599953 Eh |      |               |               |               |

**Supplementary Table 5** Optimised geometry of the transition state TS2 using DFT theory, the range-separated hybrid exchange-correlation (xc)-functional  $\omega$ B97X-D3 and the 6-311G(d,p) basis-set.

| No.                                   | Atom | x             | y             | z             |
|---------------------------------------|------|---------------|---------------|---------------|
| 1                                     | C    | 2.7512993700  | 1.3850583835  | -0.0348497181 |
| 2                                     | N    | 1.6701272678  | 1.7560114152  | -0.8014731947 |
| 3                                     | C    | 0.5742541391  | 0.9303232812  | -1.0917481591 |
| 4                                     | C    | 0.5855408542  | -0.3838198059 | -0.4992130053 |
| 5                                     | C    | 1.6867060019  | -0.7686753647 | 0.2397585816  |
| 6                                     | N    | 2.7355911244  | 0.0913074361  | 0.4595238384  |
| 7                                     | C    | -0.6101220927 | -1.1956463143 | -0.7131668788 |
| 8                                     | C    | -0.6934334200 | -2.6132172247 | -0.6186946771 |
| 9                                     | O    | 0.2704617892  | -3.4054008297 | -0.3695374549 |
| 10                                    | O    | -0.3322841326 | 1.3527855316  | -1.8044497420 |
| 11                                    | O    | 1.8438787318  | -1.9407161337 | 0.7876510134  |
| 12                                    | C    | 1.7014825404  | 3.1134805925  | -1.3396217186 |
| 13                                    | C    | 3.8890605544  | -0.3801675927 | 1.2276857479  |
| 14                                    | O    | 3.6726013667  | 2.1521956133  | 0.1838258688  |
| 15                                    | C    | -2.0712478934 | -3.0764018173 | -0.6991759170 |
| 16                                    | C    | -2.9505269199 | -2.1988531643 | -0.1848551024 |
| 17                                    | C    | -2.3750308422 | -1.0557835921 | 0.5262585121  |
| 18                                    | N    | -2.9998567559 | 0.1273796193  | 0.5718505870  |
| 19                                    | C    | -3.8227691845 | 0.5952490408  | -0.5412084252 |
| 20                                    | C    | -5.3160747844 | 0.5732262014  | -0.2342214934 |
| 21                                    | C    | -2.7038945662 | 1.0784111697  | 1.6426207351  |
| 22                                    | C    | -1.4758508490 | 1.9399446309  | 1.3777909887  |
| 23                                    | H    | 1.2091878778  | -2.6356226341 | 0.3048388100  |
| 24                                    | H    | -1.3638465879 | 2.6830899169  | 2.1711047371  |
| 25                                    | H    | -1.5576153810 | 2.4641820417  | 0.4227213334  |
| 26                                    | H    | -0.5729310988 | 1.3249689537  | 1.3543876839  |
| 27                                    | H    | -3.5890806532 | 1.7066776859  | 1.7682262979  |
| 28                                    | H    | -2.5839104732 | 0.5140809101  | 2.5705557464  |
| 29                                    | H    | -5.8758723024 | 0.9535442062  | -1.0922629379 |
| 30                                    | H    | -5.6579201639 | -0.4427840950 | -0.0214175354 |
| 31                                    | H    | -5.5527130473 | 1.2028883355  | 0.6273605660  |
| 32                                    | H    | -3.5025389927 | 1.6105543279  | -0.7973577399 |
| 33                                    | H    | -3.6051235440 | -0.0317496583 | -1.4100471469 |
| 34                                    | H    | -1.7848389403 | -1.2826708738 | 1.4084720943  |
| 35                                    | H    | -4.0295894452 | -2.3056766265 | -0.2541044647 |
| 36                                    | H    | -2.3310424147 | -4.0558555092 | -1.0835684754 |
| 37                                    | H    | -1.2714733449 | -0.7489588009 | -1.4437093081 |
| 38                                    | H    | 1.7652235805  | 3.8349382721  | -0.5248164741 |
| 39                                    | H    | 0.7845251225  | 3.2626608945  | -1.9007412861 |
| 40                                    | H    | 4.6202470269  | 0.4213541716  | 1.2424639739  |
| 41                                    | H    | 4.3122968493  | -1.2645959449 | 0.7526794443  |
| 42                                    | H    | 3.5882580159  | -0.6262404031 | 2.2460110605  |
| 43                                    | H    | 2.5643960376  | 3.2372602939  | -1.9948944055 |
| Absolute energy = 1049.39375489300 Eh |      |               |               |               |

**Supplementary Table 6** Optimised geometry of the DASA isomer C using DFT theory, the range-separated hybrid exchange-correlation (xc)-functional  $\omega$ B97X-D3 and the 6-311G(d,p) basis-set.

| No.                                   | Atom | x             | y             | z             |
|---------------------------------------|------|---------------|---------------|---------------|
| 1                                     | C    | 2.6497251830  | 1.3340702394  | -0.0451373666 |
| 2                                     | N    | 1.5993264010  | 1.7317103410  | -0.8431216511 |
| 3                                     | C    | 0.4748168529  | 0.9501615784  | -1.1357922969 |
| 4                                     | C    | 0.4016489182  | -0.3341380848 | -0.4801429435 |
| 5                                     | C    | 1.4829647088  | -0.7514160021 | 0.2356104877  |
| 6                                     | N    | 2.5732943467  | 0.0472767833  | 0.4638499648  |
| 7                                     | C    | -0.8729154324 | -1.1075727176 | -0.6245996894 |
| 8                                     | C    | -0.7669189991 | -2.5941980518 | -0.9054023940 |
| 9                                     | O    | 0.2366900846  | -3.1745400907 | -1.2938735524 |
| 10                                    | O    | -0.3848154563 | 1.3764126871  | -1.8982114484 |
| 11                                    | O    | 1.5965478112  | -1.9508978792 | 0.8042300208  |
| 12                                    | C    | 1.7019366127  | 3.0722764912  | -1.4153624866 |
| 13                                    | C    | 3.7082965754  | -0.4738313712 | 1.2305173331  |
| 14                                    | O    | 3.5962145234  | 2.0659596783  | 0.1782552874  |
| 15                                    | C    | -2.0352308242 | -3.2143368731 | -0.5091521470 |
| 16                                    | C    | -2.6744118140 | -2.3733930200 | 0.3081807017  |
| 17                                    | C    | -1.9355316293 | -1.0743805010 | 0.5394148254  |
| 18                                    | N    | -2.8391864209 | 0.0400445888  | 0.6783739910  |
| 19                                    | C    | -3.4471461183 | 0.5164270652  | -0.5579983667 |
| 20                                    | C    | -4.7564820822 | 1.2620139900  | -0.3311945604 |
| 21                                    | C    | -2.5101215747 | 1.0407548830  | 1.6854354775  |
| 22                                    | C    | -1.4133295038 | 2.0514792482  | 1.3454732934  |
| 23                                    | H    | 1.1685493457  | -2.6073050566 | 0.2268857936  |
| 24                                    | H    | -1.3542859443 | 2.8130471466  | 2.1283968110  |
| 25                                    | H    | -1.6096755716 | 2.5574659824  | 0.3963396375  |
| 26                                    | H    | -0.4359246871 | 1.5673383704  | 1.2793203671  |
| 27                                    | H    | -3.4303332681 | 1.5814612943  | 1.9256684288  |
| 28                                    | H    | -2.2355676422 | 0.5017711889  | 2.5980197113  |
| 29                                    | H    | -5.2360767648 | 1.4684518739  | -1.2914389608 |
| 30                                    | H    | -5.4402088997 | 0.6619108704  | 0.2761481867  |
| 31                                    | H    | -4.6024145865 | 2.2203181358  | 0.1716078383  |
| 32                                    | H    | -2.7563612894 | 1.1447414821  | -1.1405316465 |
| 33                                    | H    | -3.6551697274 | -0.3659343157 | -1.1743591130 |
| 34                                    | H    | -1.3874904716 | -1.1732880062 | 1.4841400564  |
| 35                                    | H    | -3.6170158788 | -2.5636239385 | 0.8111465433  |
| 36                                    | H    | -2.3129191909 | -4.2272684086 | -0.7707939546 |
| 37                                    | H    | -1.3835076391 | -0.7013878795 | -1.5060280948 |
| 38                                    | H    | 1.7841950954  | 3.8094745641  | -0.6166573264 |
| 39                                    | H    | 0.8031327388  | 3.2484570110  | -1.9976035175 |
| 40                                    | H    | 4.4609948334  | 0.3070971494  | 1.2624534947  |
| 41                                    | H    | 4.1104417069  | -1.3605066651 | 0.7417538462  |
| 42                                    | H    | 3.3951044386  | -0.7251936366 | 2.2433336541  |
| 43                                    | H    | 2.5816199484  | 3.1386006430  | -2.0563141622 |
| Absolute energy = 1049.41860847750 Eh |      |               |               |               |



**Supplementary Table 7** Optimised geometry of the DASA isomer C' using DFT theory, the range-separated hybrid exchange-correlation (xc)-functional  $\omega$ B97X-D3 and the 6-311G(d,p) basis-set.

| No.                                   | Atom | x             | y             | z             |
|---------------------------------------|------|---------------|---------------|---------------|
| 1                                     | C    | 2.7082412240  | 1.2621411024  | -0.1627573814 |
| 2                                     | N    | 1.7001675983  | 1.7185244874  | -0.9822376537 |
| 3                                     | C    | 0.4773214000  | 1.0407032646  | -1.1977349075 |
| 4                                     | C    | 0.3225074407  | -0.1780709714 | -0.5146577179 |
| 5                                     | C    | 1.3042084467  | -0.6838264405 | 0.3560316165  |
| 6                                     | N    | 2.4850575817  | 0.0692155372  | 0.4909622511  |
| 7                                     | C    | -0.9371966954 | -0.9541212654 | -0.6792423181 |
| 8                                     | C    | -0.7494814556 | -2.4004170652 | -1.1505483835 |
| 9                                     | O    | 0.0777186594  | -2.7778936216 | -1.9465744256 |
| 10                                    | O    | -0.3715239965 | 1.5586652454  | -1.9436057200 |
| 11                                    | O    | 1.1923897205  | -1.7323276683 | 1.0127363728  |
| 12                                    | C    | 1.9415682226  | 2.9859851652  | -1.6598270544 |
| 13                                    | C    | 3.5155691141  | -0.4529702276 | 1.3793147139  |
| 14                                    | O    | 3.7465594097  | 1.8996134219  | -0.0284523592 |
| 15                                    | C    | -1.7890517486 | -3.2279989582 | -0.4987070117 |
| 16                                    | C    | -2.4267085217 | -2.5039145245 | 0.4174898028  |
| 17                                    | C    | -1.8487799045 | -1.1194585484 | 0.5549105285  |
| 18                                    | N    | -2.9540208237 | -0.0911102993 | 0.7597680481  |
| 19                                    | C    | -3.4937992577 | 0.4906886636  | -0.5186928196 |
| 20                                    | C    | -4.7489038221 | 1.3121126384  | -0.2970714300 |
| 21                                    | C    | -2.6256412504 | 0.9375800296  | 1.8160851350  |
| 22                                    | C    | -1.5718801113 | 1.9435758234  | 1.4090760443  |
| 23                                    | H    | -1.4371477215 | 2.6388063795  | 2.2397258244  |
| 24                                    | H    | -1.8663394097 | 2.5229985218  | 0.5321129650  |
| 25                                    | H    | -0.6135550049 | 1.4632074721  | 1.2062326911  |
| 26                                    | H    | -3.5687655581 | 1.4246048135  | 2.0633761584  |
| 27                                    | H    | -2.3121662550 | 0.3630962311  | 2.6887689855  |
| 28                                    | H    | -5.1607952390 | 1.5705314548  | -1.2740023072 |
| 29                                    | H    | -5.5077104190 | 0.7461046507  | 0.2502021489  |
| 30                                    | H    | -4.5474549477 | 2.2432267708  | 0.2352975187  |
| 31                                    | H    | -2.6965449325 | 1.0799566627  | -0.9725497861 |
| 32                                    | H    | -3.7042595819 | -0.3621991796 | -1.1671762835 |
| 33                                    | H    | -1.2410804549 | -1.0813312328 | 1.4621384195  |
| 34                                    | H    | -3.2309128036 | -2.8521350938 | 1.0587928342  |
| 35                                    | H    | -1.9619430942 | -4.2690404119 | -0.7401855129 |
| 36                                    | H    | -1.5006140810 | -0.4921005402 | -1.4945318213 |
| 37                                    | H    | 2.1094873894  | 3.7807040056  | -0.9313544356 |
| 38                                    | H    | 1.0600811928  | 3.2075665295  | -2.2539922961 |
| 39                                    | H    | 4.3785056176  | 0.2031752530  | 1.3216681628  |
| 40                                    | H    | 3.7943948439  | -1.4616082148 | 1.0725919597  |
| 41                                    | H    | 3.1470297705  | -0.4895052688 | 2.4059184293  |
| 42                                    | H    | 2.8171598313  | 2.9117807305  | -2.3070020806 |
| 43                                    | H    | -3.7300803727 | -0.6179653223 | 1.1667630952  |
| Absolute energy = 1049.43353746842 Eh |      |               |               |               |

**Supplementary Table 8** Optimised geometry of *E*-Azo using DFT theory, the range-separated hybrid exchange-correlation (xc)-functional  $\omega$ B97X-D3 and the 6-311G(d,p) basis-set.

| No.                                   | Atom | x             | y             | z             |
|---------------------------------------|------|---------------|---------------|---------------|
| 1                                     | C    | -4.3192821955 | 2.9117833359  | -0.0942194766 |
| 2                                     | C    | -4.1970227182 | 1.5302219794  | 0.0475945910  |
| 3                                     | C    | -3.1841620639 | 3.7084130376  | -0.0805655452 |
| 4                                     | C    | -1.9230809553 | 3.1330525107  | 0.0628765195  |
| 5                                     | C    | -1.7988045241 | 1.7489747295  | 0.2116494965  |
| 6                                     | C    | -2.9324688313 | 0.9568862491  | 0.2031641742  |
| 7                                     | H    | -5.2981287633 | 3.3604048024  | -0.2105380152 |
| 8                                     | H    | -3.2579008001 | 4.7852898481  | -0.1846272935 |
| 9                                     | H    | -0.8160683794 | 1.3113119683  | 0.3332341931  |
| 10                                    | H    | -2.8510877583 | -0.1178682910 | 0.3198493478  |
| 11                                    | C    | 1.3287996934  | 5.7549215992  | 0.1154691384  |
| 12                                    | C    | 1.3981911769  | 4.3587944192  | 0.0075207765  |
| 13                                    | C    | 2.4733882922  | 6.5184869846  | 0.1170627181  |
| 14                                    | C    | 3.7562903807  | 5.9174113418  | 0.0118346462  |
| 15                                    | C    | 3.8123469921  | 4.5079156312  | -0.1007372545 |
| 16                                    | C    | 2.6539163360  | 3.7574795760  | -0.0991858108 |
| 17                                    | N    | -0.8281771295 | 4.0407637916  | 0.0647741881  |
| 18                                    | N    | 0.2915746822  | 3.4962121823  | -0.0054378843 |
| 19                                    | N    | 4.8879224822  | 6.6724760831  | 0.0207858066  |
| 20                                    | C    | 4.8019833288  | 8.1214670436  | 0.0695896089  |
| 21                                    | H    | 4.2697629386  | 8.5268843723  | -0.7988047192 |
| 22                                    | H    | 5.8087386096  | 8.5342348993  | 0.0745293977  |
| 23                                    | H    | 4.2923643885  | 8.4627280040  | 0.9766774001  |
| 24                                    | C    | 6.1861064522  | 6.0416288129  | -0.1381878887 |
| 25                                    | H    | 6.9594831428  | 6.8042513268  | -0.0730358266 |
| 26                                    | H    | 6.2773183506  | 5.5383003322  | -1.1080953729 |
| 27                                    | H    | 6.3702057702  | 5.3044504744  | 0.6502075697  |
| 28                                    | H    | 0.3595271574  | 6.2327451118  | 0.1963409563  |
| 29                                    | H    | 2.3816236889  | 7.5935005130  | 0.2010945461  |
| 30                                    | H    | 4.7640888011  | 4.0012654324  | -0.1884539177 |
| 31                                    | H    | 2.7047107564  | 2.6765215836  | -0.1846643599 |
| 32                                    | C    | -5.3832162001 | 0.6270191562  | 0.0454235891  |
| 33                                    | O    | -6.5302297675 | 1.2853417383  | -0.1133095592 |
| 34                                    | C    | -7.7228829279 | 0.4872409428  | -0.1270522040 |
| 35                                    | H    | -7.6899724612 | -0.2263583166 | -0.9514018038 |
| 36                                    | H    | -8.5409225919 | 1.1898276696  | -0.2644392015 |
| 37                                    | H    | -7.8306804138 | -0.0462143635 | 0.8182182506  |
| 38                                    | O    | -5.3193149398 | -0.5745265122 | 0.1727292190  |
| Absolute energy = 934.574900111347 Eh |      |               |               |               |

**Supplementary Table 9** Optimised geometry of the transition state between *E*-Azo and *Z*-Azo using DFT theory, the range-separated hybrid exchange-correlation (xc)-functional  $\omega$ B97X-D3 and the 6-311G(d,p) basis-set.

| No.                                   | Atom | x             | y             | z             |
|---------------------------------------|------|---------------|---------------|---------------|
| 1                                     | C    | 3.8008497112  | -1.2718930839 | 0.1603814213  |
| 2                                     | C    | 3.8291071264  | 0.0965548691  | -0.1159168511 |
| 3                                     | C    | 2.6118409806  | -1.9734776931 | 0.0409743868  |
| 4                                     | C    | 1.4413869260  | -1.3144225813 | -0.3271331303 |
| 5                                     | C    | 1.4694180190  | 0.0487688349  | -0.6153233205 |
| 6                                     | C    | 2.6599292833  | 0.7489305703  | -0.5120442555 |
| 7                                     | H    | 4.7070253875  | -1.7814767713 | 0.4639800771  |
| 8                                     | H    | 2.5669345877  | -3.0399246528 | 0.2367524998  |
| 9                                     | H    | 0.5623061812  | 0.5467465497  | -0.9380792349 |
| 10                                    | H    | 2.6979992524  | 1.8080824010  | -0.7408532845 |
| 11                                    | C    | -2.1455497391 | 0.4239978117  | 0.0749451278  |
| 12                                    | C    | -2.0189676511 | -0.9366125955 | -0.3029943179 |
| 13                                    | C    | -3.3710060450 | 1.0315510252  | 0.2009831870  |
| 14                                    | C    | -4.5692229354 | 0.3198048515  | -0.0797887038 |
| 15                                    | C    | -4.4529104772 | -1.0436501858 | -0.4661038826 |
| 16                                    | C    | -3.2216353917 | -1.6430076695 | -0.5572593201 |
| 17                                    | N    | 0.2605484137  | -2.1453852233 | -0.4430918535 |
| 18                                    | N    | -0.8315962782 | -1.5559694394 | -0.4001820797 |
| 19                                    | N    | -5.7792142207 | 0.9168622327  | 0.0175365039  |
| 20                                    | C    | -5.8837092453 | 2.3069069973  | 0.4340294436  |
| 21                                    | H    | -5.4939878433 | 2.4528026614  | 1.4471744133  |
| 22                                    | H    | -6.9314523955 | 2.5993735125  | 0.4257958355  |
| 23                                    | H    | -5.3384190116 | 2.9679917908  | -0.2467289746 |
| 24                                    | C    | -6.9954633817 | 0.1654369065  | -0.2524758778 |
| 25                                    | H    | -7.8500581206 | 0.8299939393  | -0.1470102144 |
| 26                                    | H    | -7.1186164341 | -0.6663760057 | 0.4493021526  |
| 27                                    | H    | -6.9985663170 | -0.2355491677 | -1.2708852128 |
| 28                                    | H    | -1.2471844169 | 0.9925169925  | 0.2893390438  |
| 29                                    | H    | -3.4131197503 | 2.0676598247  | 0.5100196462  |
| 30                                    | H    | -5.3389604268 | -1.6261771739 | -0.6816611353 |
| 31                                    | H    | -3.1494381320 | -2.6882085392 | -0.8403084905 |
| 32                                    | C    | 5.0805387176  | 0.8961386089  | -0.0137402833 |
| 33                                    | O    | 6.1294644874  | 0.1617211391  | 0.3566617806  |
| 34                                    | C    | 7.3770492928  | 0.8567786897  | 0.4875612397  |
| 35                                    | H    | 7.6702152795  | 1.2932815478  | -0.4682024965 |
| 36                                    | H    | 8.0980217605  | 0.1045190990  | 0.7975751533  |
| 37                                    | H    | 7.2948593229  | 1.6411657188  | 1.2410980749  |
| 38                                    | O    | 5.1493870536  | 2.0834033097  | -0.2387388671 |
| Absolute energy = 934.502985475218 Eh |      |               |               |               |

**Supplementary Table 10** Optimised geometry of Z-Azo using DFT theory, the range-separated hybrid exchange-correlation (xc)-functional  $\omega$ B97X-D3 and the 6-311G(d,p) basis-set.

| No.                                   | Atom | x             | y             | z             |
|---------------------------------------|------|---------------|---------------|---------------|
| 1                                     | C    | 2.8438996586  | -0.8469799348 | 0.7501133643  |
| 2                                     | C    | 2.8292069145  | -0.1944344929 | -0.4830362175 |
| 3                                     | C    | 1.9055556430  | -1.8291145735 | 1.0270765321  |
| 4                                     | C    | 0.9268740533  | -2.1354390953 | 0.0845130001  |
| 5                                     | C    | 0.9182600381  | -1.5029289454 | -1.1593450233 |
| 6                                     | C    | 1.8687126636  | -0.5361907663 | -1.4356404899 |
| 7                                     | H    | 3.5954603185  | -0.5936247199 | 1.4875420435  |
| 8                                     | H    | 1.9159842271  | -2.3564909391 | 1.9745297581  |
| 9                                     | H    | 0.1703281819  | -1.7689447600 | -1.8980995062 |
| 10                                    | H    | 1.8741059534  | -0.0338413565 | -2.3960650561 |
| 11                                    | C    | -1.5360563805 | -0.6875408955 | 0.7553919476  |
| 12                                    | C    | -1.9038113074 | -1.9224720550 | 0.2094630584  |
| 13                                    | C    | -2.3663123847 | 0.4094688830  | 0.6415527361  |
| 14                                    | C    | -3.5987675028 | 0.3304655118  | -0.0506913155 |
| 15                                    | C    | -3.9756674662 | -0.9328531605 | -0.5620253264 |
| 16                                    | C    | -3.1521546855 | -2.0295812740 | -0.4069830743 |
| 17                                    | N    | 0.0504475961  | -3.2358915355 | 0.3499214868  |
| 18                                    | N    | -1.1876081548 | -3.1455607194 | 0.3338782426  |
| 19                                    | N    | -4.4012799980 | 1.4248729649  | -0.2008525063 |
| 20                                    | C    | -4.0608066938 | 2.6707127518  | 0.4624884657  |
| 21                                    | H    | -4.0511476003 | 2.5689361147  | 1.5553188709  |
| 22                                    | H    | -4.7989746629 | 3.4244226198  | 0.1948483808  |
| 23                                    | H    | -3.0798558923 | 3.0329865029  | 0.1409125726  |
| 24                                    | C    | -5.7315206674 | 1.2738539177  | -0.7634585900 |
| 25                                    | H    | -6.1982222904 | 2.2546891862  | -0.8329785220 |
| 26                                    | H    | -6.3705421267 | 0.6297673373  | -0.1457256436 |
| 27                                    | H    | -5.6888397397 | 0.8500934651  | -1.7712526774 |
| 28                                    | H    | -0.6111829427 | -0.5811562427 | 1.3082782834  |
| 29                                    | H    | -2.0553292561 | 1.3385292448  | 1.1005644032  |
| 30                                    | H    | -4.9257800103 | -1.0609400827 | -1.0635474056 |
| 31                                    | H    | -3.4670582678 | -2.9998598883 | -0.7776883170 |
| 32                                    | C    | 3.8231919759  | 0.8554074922  | -0.8372889250 |
| 33                                    | O    | 4.7124800592  | 1.0680751196  | 0.1316302516  |
| 34                                    | C    | 5.7084875298  | 2.0669016922  | -0.1294695807 |
| 35                                    | H    | 6.3052090755  | 1.7883546531  | -0.9991064279 |
| 36                                    | H    | 6.3284215027  | 2.0981340015  | 0.7629535002  |
| 37                                    | H    | 5.2368897866  | 3.0354418883  | -0.3006865138 |
| 38                                    | O    | 3.8311528521  | 1.4541620902  | -1.8889957794 |
| Absolute energy = 934.556531647269 Eh |      |               |               |               |

## 6. References

1. L.-Y. Hsu, P. Mainik, A. Münchinger, S. Lindenthal, T. Spratte, A. Welle, J. Zaumseil, C. Selhuber-Unkel, M. Wegener and E. Blasco, A Facile Approach for 4D Microprinting of Multi-Photoresponsive Actuators, *Adv. Mater. Technol.*, 2022, **8**, 2200801.
2. T. Schmitt, L.-Y. Hsu, N. Oberhof, D. Rana, A. Dreuw, E. Blasco and P. Tegeder, Ultrafast Excited States Dynamics of Orthogonal Photoswitches and The Influence of the Environment, *Adv. Funct. Mater.*, 2023, **n/a**, 2300863.
